# Supplementary material for: Fanconi anemia A protein participates in nucleolar homeostasis maintenance and ribosome biogenesis
Source: PubMed Central journal article supplement — Sci Adv. 2021 Jan 1;7(1):eabb5414. doi: 10.1126/sciadv.abb5414 (PMC7775781; doi:10.1126/sciadv.abb5414), 2021-01-01
Supplement: abb5414_SM.pdf [file abb5414_SM.pdf]

## Supplementary Materials for

### **Fanconi anemia A protein participates in nucleolar homeostasis maintenance and ribosome biogenesis**

Anna Gueiderikh, Frédérique Maczkowiak-Chartois, Guillaume Rouvet, Sylvie Souquère-Besse, Sébastien Apcher, Jean-Jacques Diaz, Filippo Rosselli\*

\*Corresponding author. Email: [filippo.rosselli@gustaveroussy.fr](mailto:filippo.rosselli@gustaveroussy.fr)

Published 1 January 2021, *Sci. Adv.* 7, eabb5414 (2021)  
DOI: 10.1126/sciadv.abb5414

#### **This PDF file includes:**

Figs. S1 to S3  
Tables S1 to S5  
References

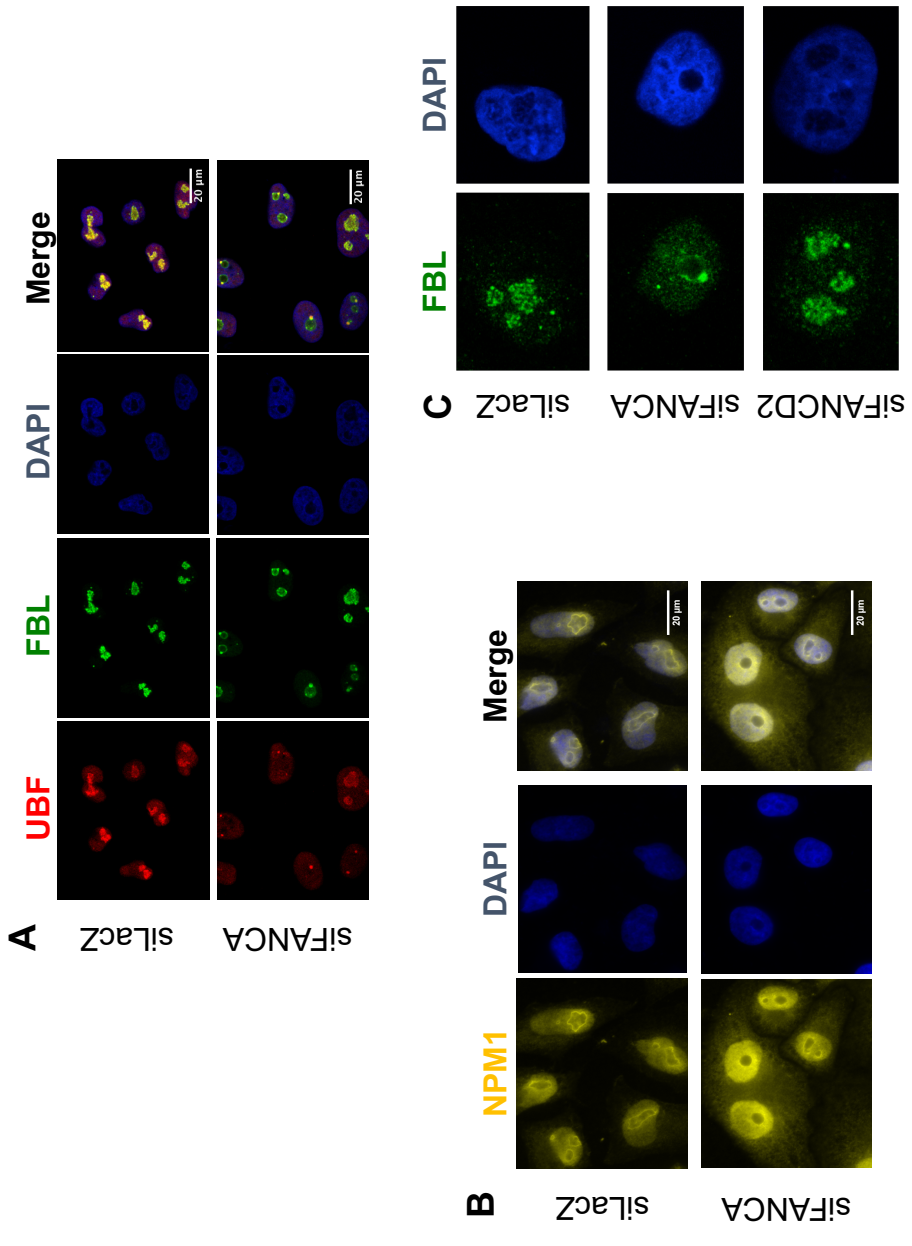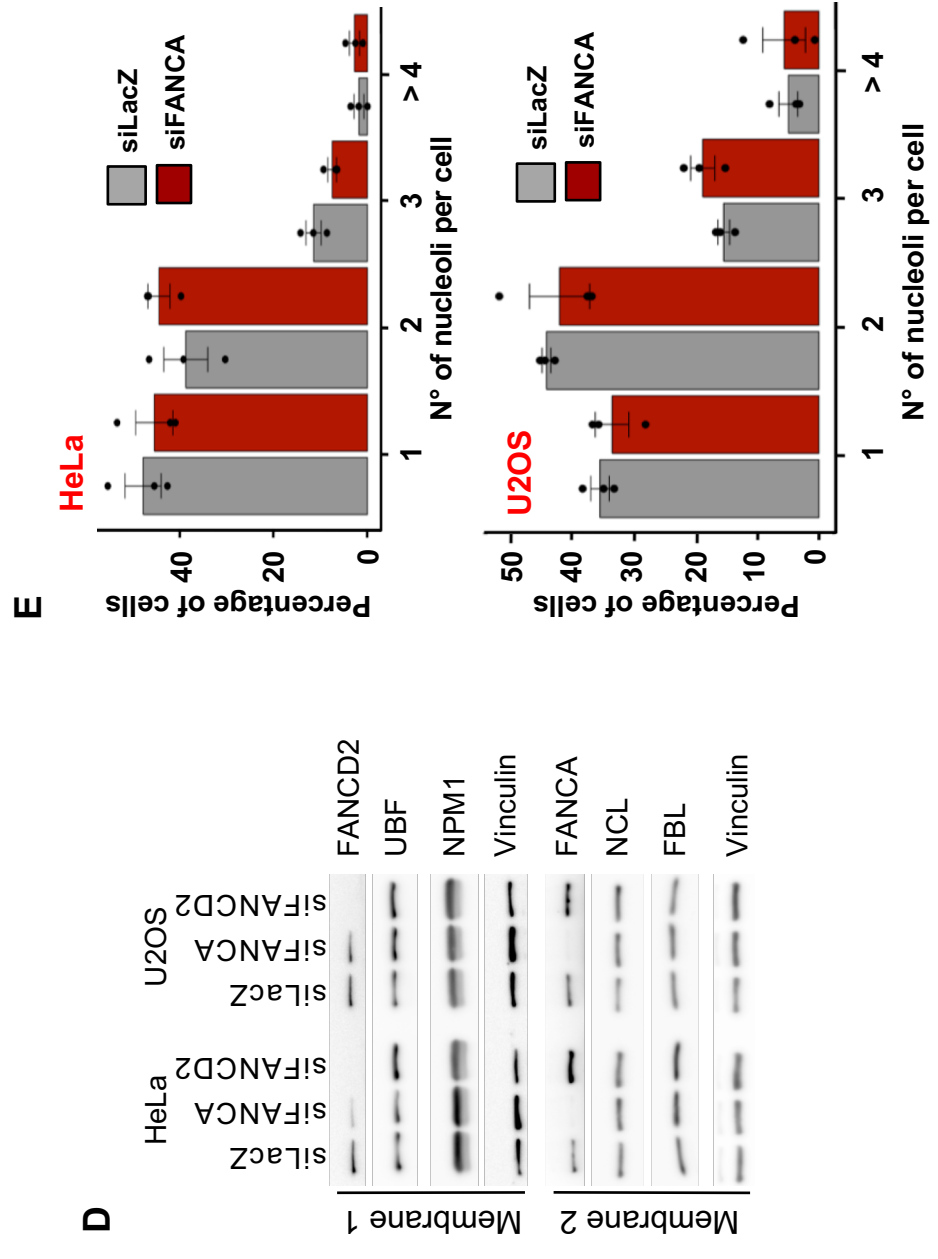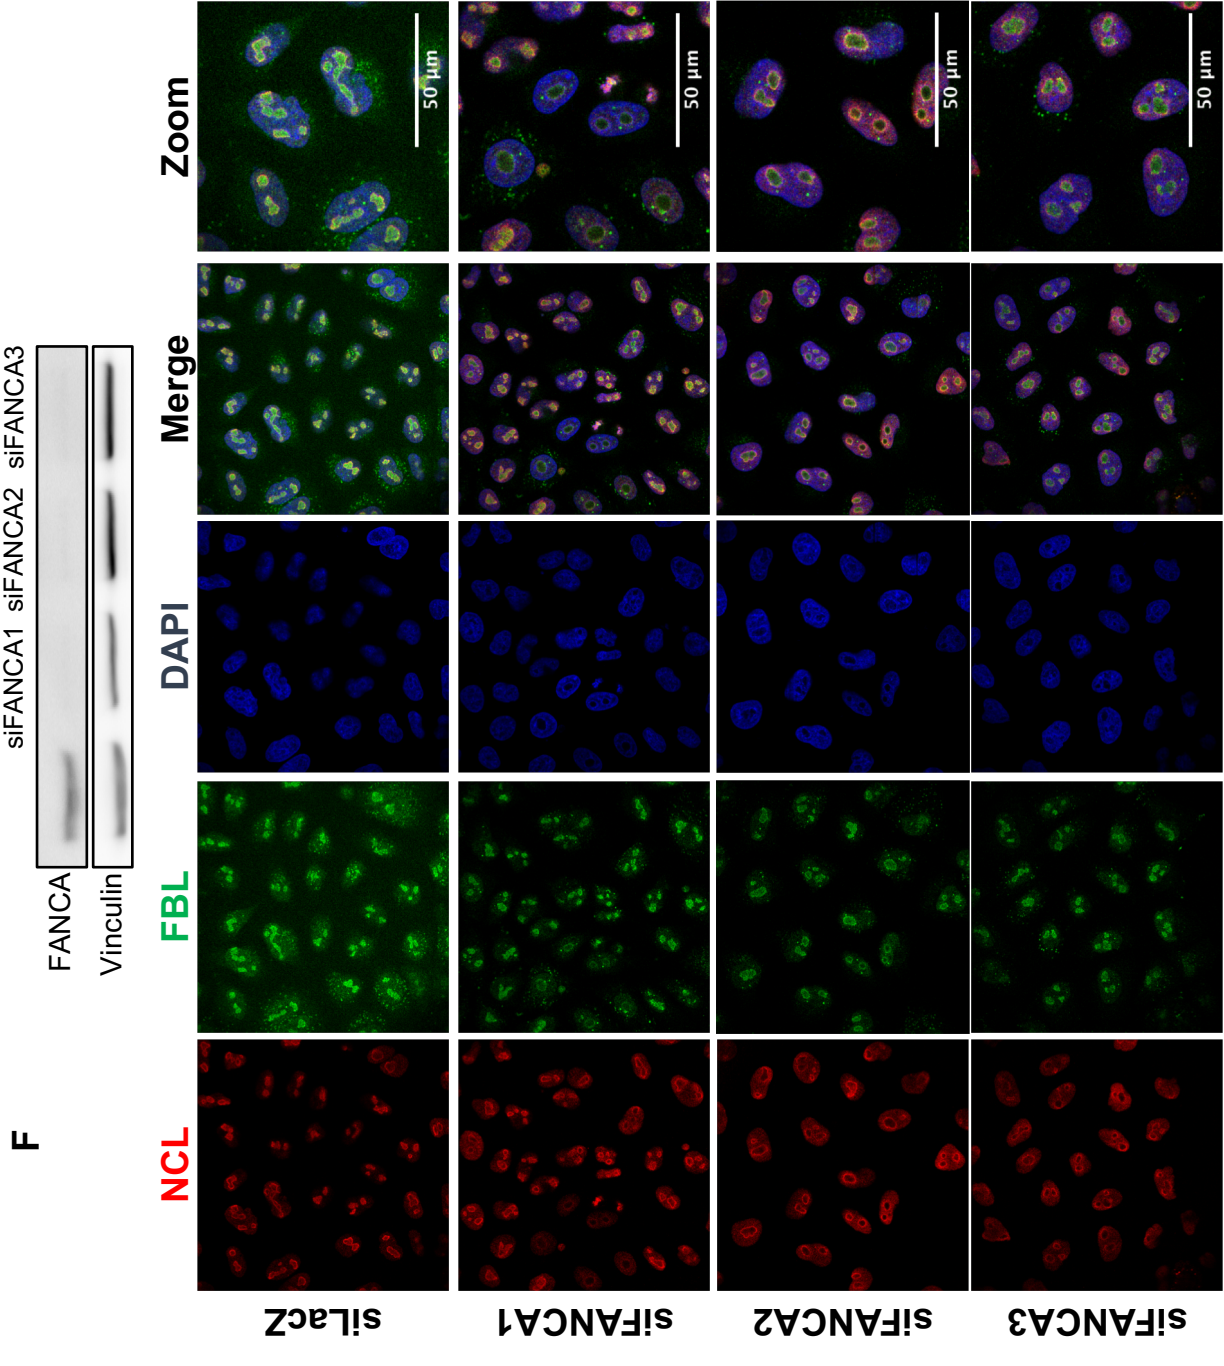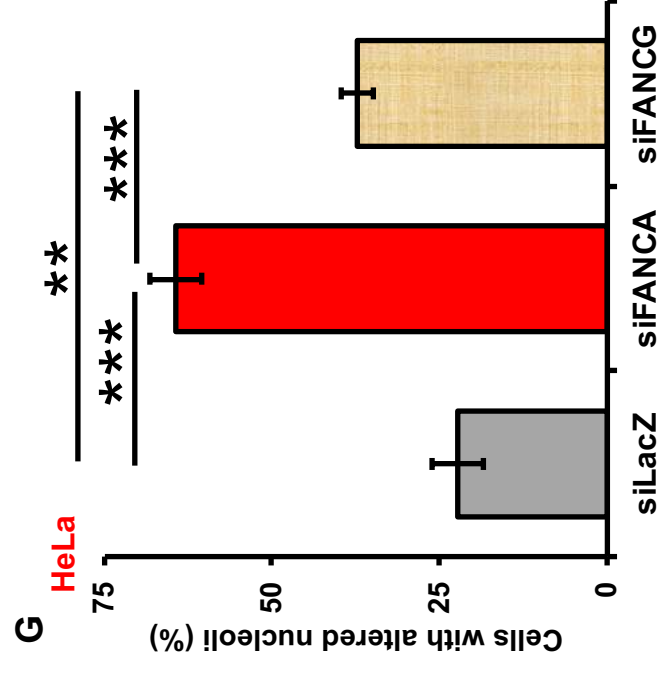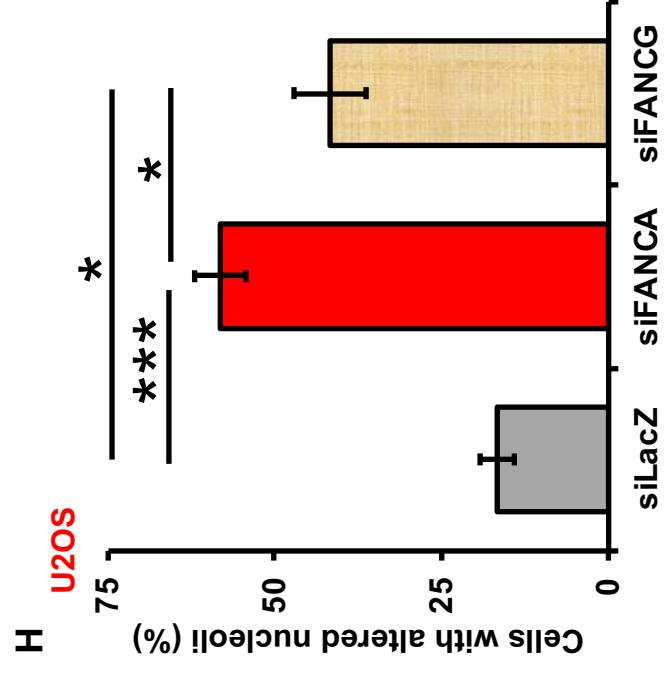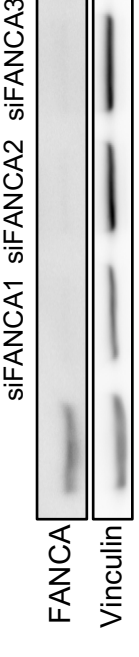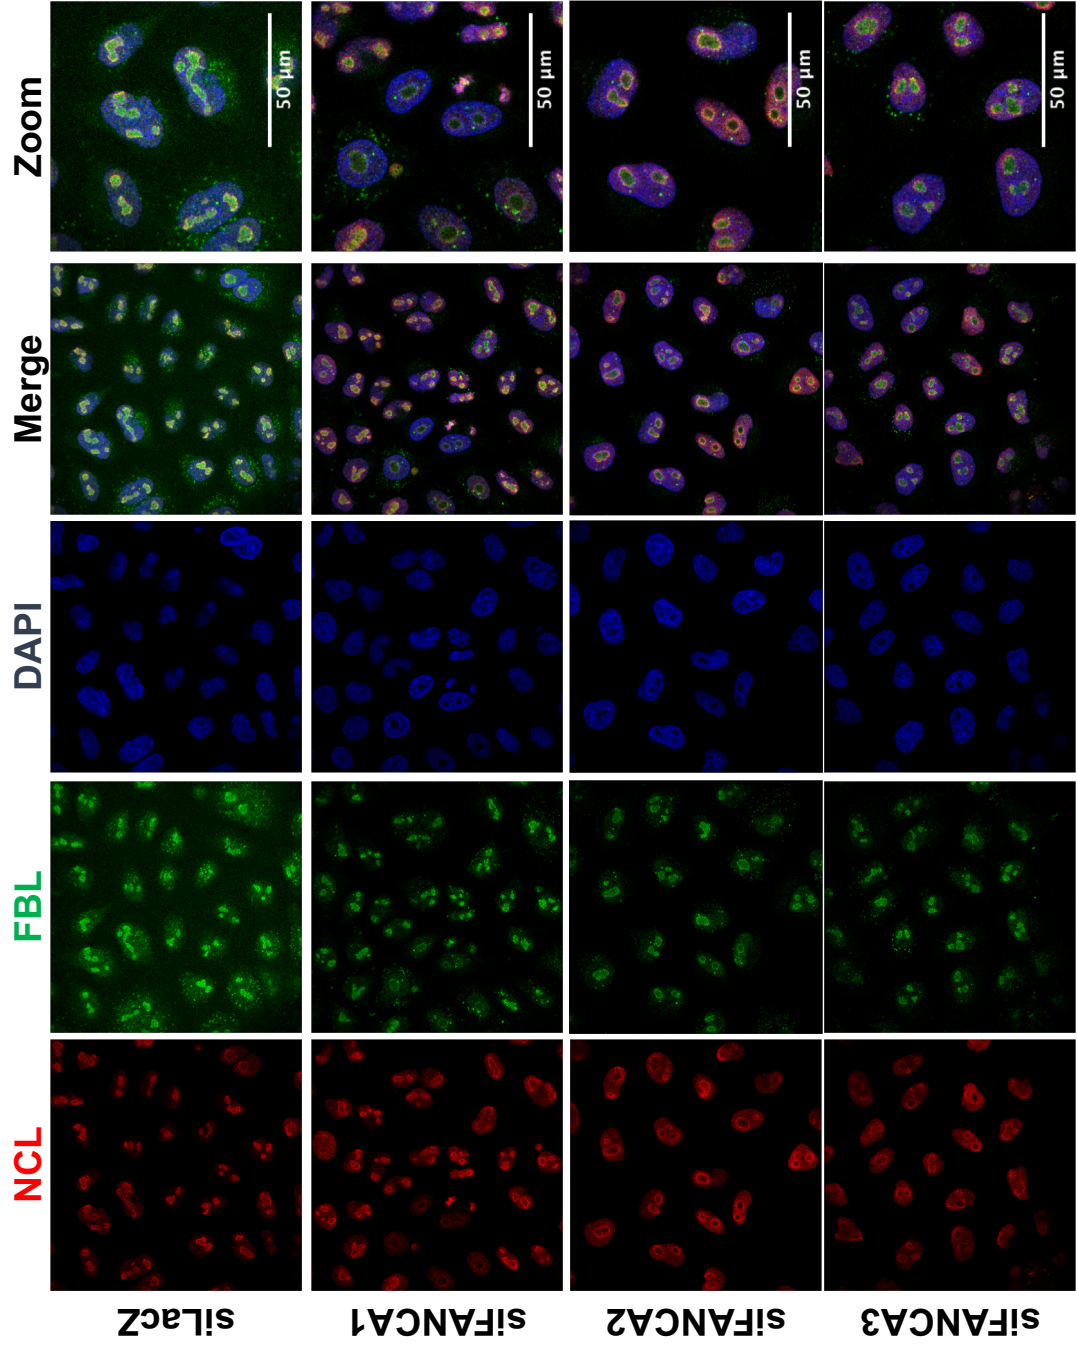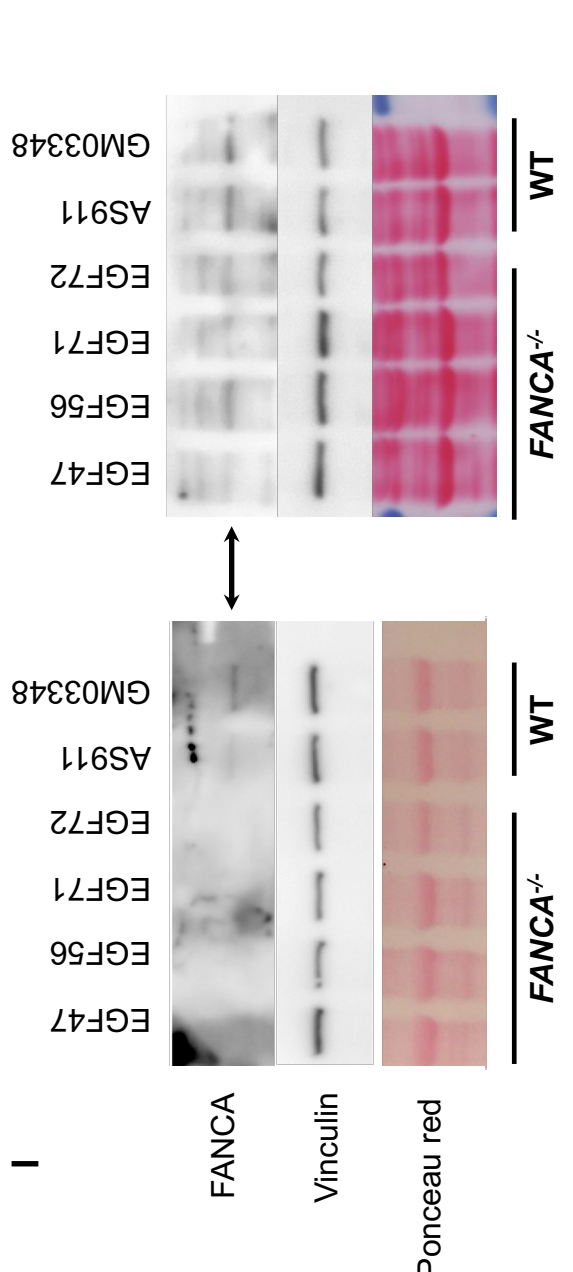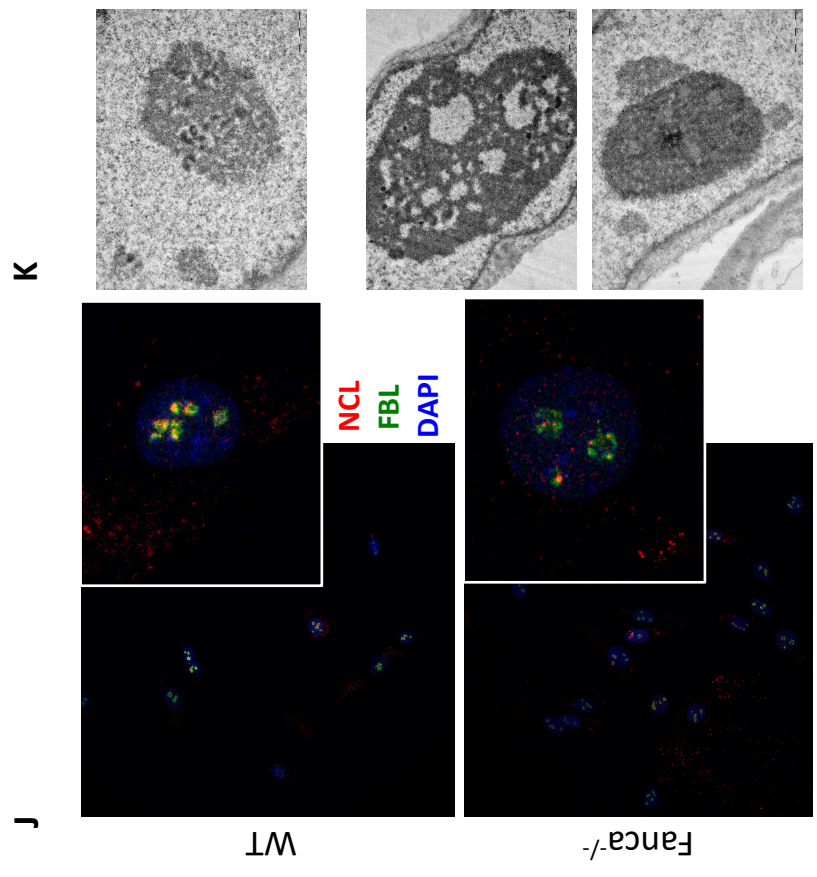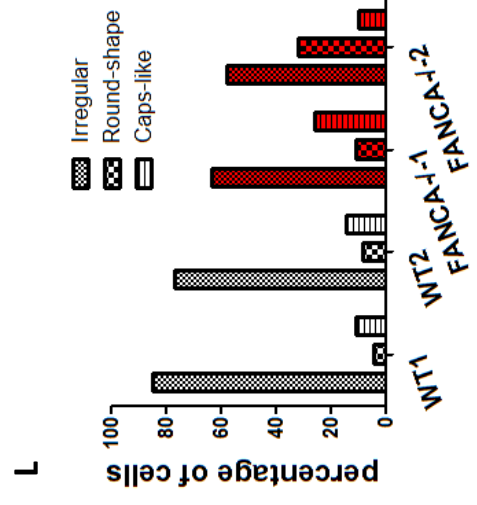

**Supplementary Figure S1: Nucleolar abnormalities in FANCA pathway-deficient cells.**

**A.** Confocal microscopy images showing wide fields of HeLa cells after transfection with untargeted (siLacZ) or FANCA-targeted siRNAs stained with antibodies against the nucleolar proteins UBF (Red) and FBL (Green) and counterstained with DAPI to visualize DNA

**B.** Confocal microscopy images showing wide fields of HeLa cells after transfection with untargeted (siLacZ) or FANCA-targeted siRNAs stained with antibodies against the nucleolar protein NPM1 (yellow) counterstained with DAPI to visualize DNA.

**C.** Confocal microscopy images showing single HeLa cells after transfection with untargeted (siLacZ), FANCA- or FANCD2-targeted siRNAs stained with antibodies against the nucleolar protein FBL (Green) and counterstained with DAPI to visualize DNA.

**D.** Western blot showing the consequence of FANCA or FANCD2 siRNA-mediated depletion in HeLa or U2OS cells 72 h after transfection on FANCA, FANCD2, NPM1, NCL and FBL expression. Vinculin was utilized as a loading control.

**E.** Percentage of cells showing 1, 2 or more nucleoli as a function of FANCA expression in HeLa (top panel) or U2OS (bottom panel) cells. Bars represent the means of 3 independent experiments +/- sem.

**F.** Immunofluorescence microscopy images showing wide fields of HeLa cells 72 h after transfection with untargeted (siLacZ) or one of the three siFANCA1 to siFANCA3 siRNAs that were pooled are shown in Fig. 1a. Cells were stained with antibodies against the nucleolar proteins NCL (Red) and FBL (Green) and counterstained with DAPI to visualize DNA. Top : WB illustrating the shutdown of FANCA expression induced by each single siRNA is shown. Vinculin was utilized as a loading control. Bars represent the means of 3 independent experiments +/- sem.

**G and H.** Percentage of HeLa (G) or U2OS (H) cells presenting nucleolar abnormalities (a round or cap-like shape) following transfection with the indicated siRNA. The presented data originate from an independent set of experiments that are presented in Figure 1.

**I.** Western blots showing the expression of FANCA in human primary fibroblasts.

**J.** Immunofluorescence microscopy images showing single nuclei of mouse primary fibroblasts from 3- to 5-month-old WT or *Fanca*<sup>-/-</sup> mice stained as described above.

**K.** Electronic micrographs showing nucleolar morphology as observed in mouse primary fibroblasts from WT (i) or *Fanca*<sup>-/-</sup> mouse fibroblasts (ii and iii).

**L.** Percentage of mouse primary fibroblasts presenting canonical nucleolar morphology (irregular shape) or a round or cap-like shape. Analyses of fibroblasts isolated from two WT and two *Fanca*<sup>-/-</sup> mice are reported.

**A**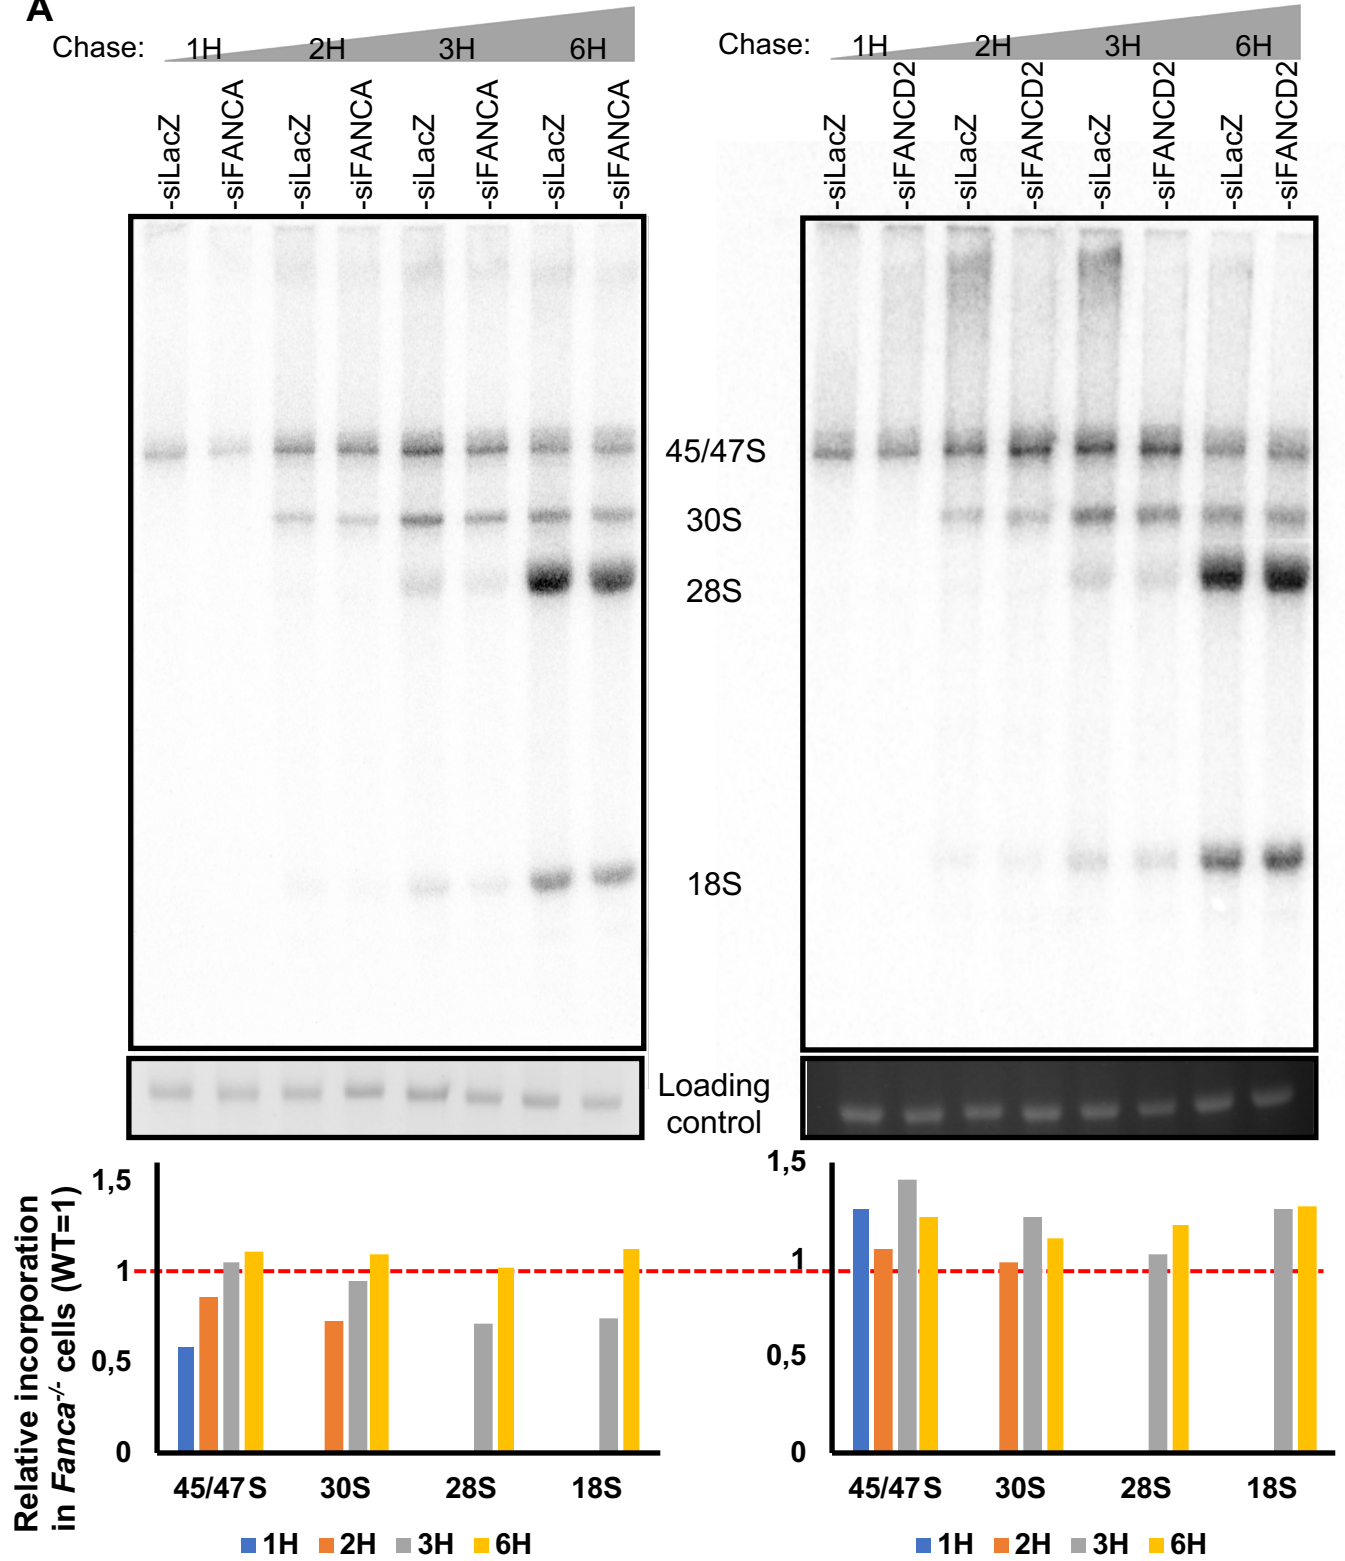**B**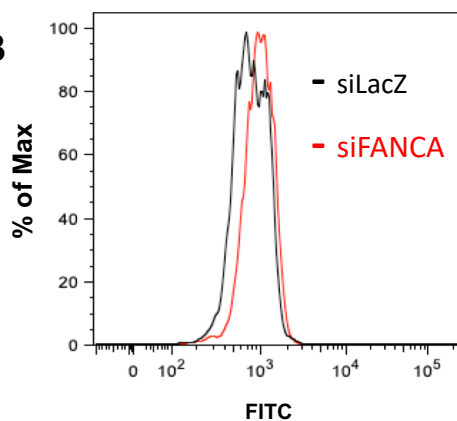



**Supplementary Figure S2: rDNA transcription and rRNA processing in FANC pathway-deficient cells.**

**A.** Representative experiments showing precursor and mature rRNAs. After 72 h of siRNA transfection, HeLa cells were labelled for 20 min with  $^{32}\text{P}$ -orthophosphate and chased with cold orthophosphate for 1, 2, 3 and 6 h. The EtBr-stained gel is shown at the bottom as a loading control. Bottom, relative level of different rRNA forms in siFANCA- or FANCD2-transfected cells normalized vs the FANC proficient cells settled to 1 each time.

**B.** Example of FACS analysis measuring the level of EU incorporation into cells following 15 min of incubation. The black line represents the profile of HeLa cells transfected with an untargeted siRNA, and the red line shows the profile of HeLa cells 72 h following transfection with siRNAs targeting FANCA.

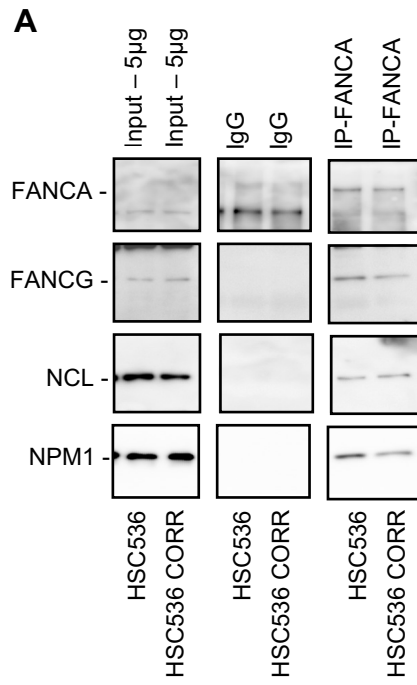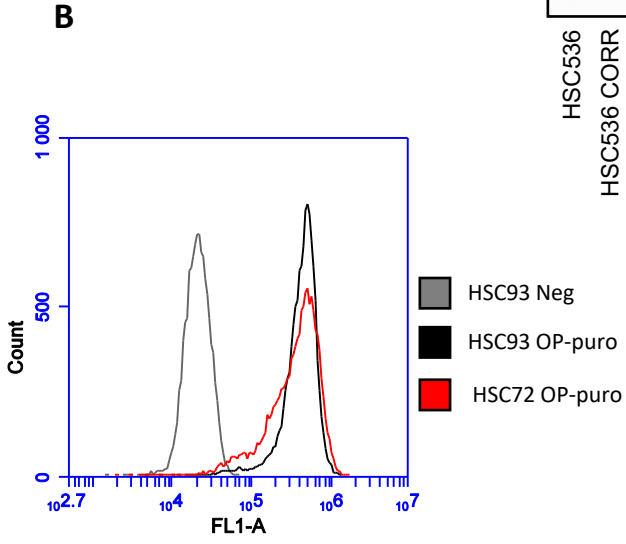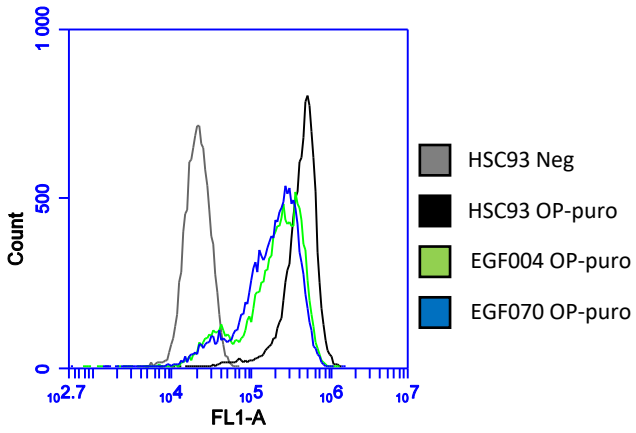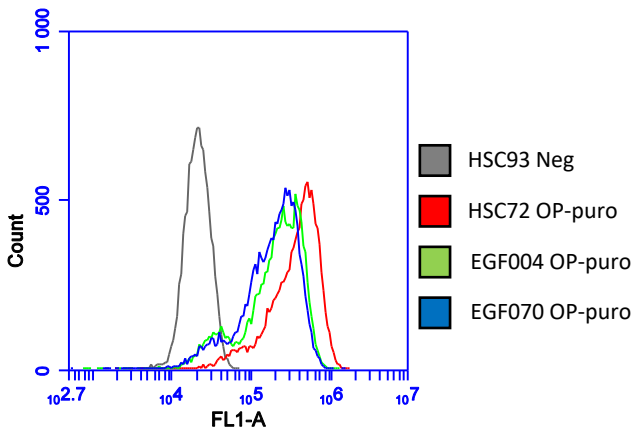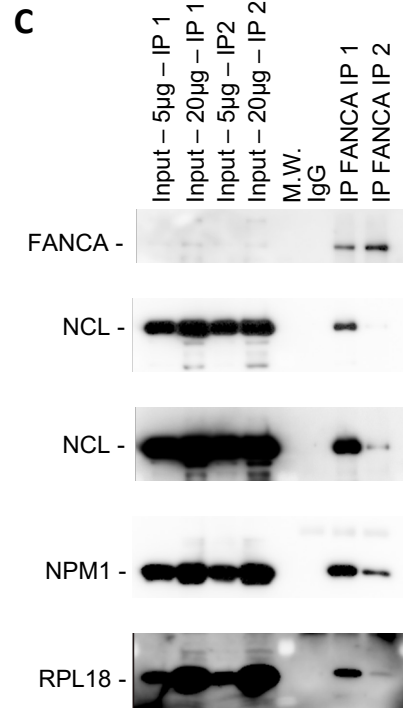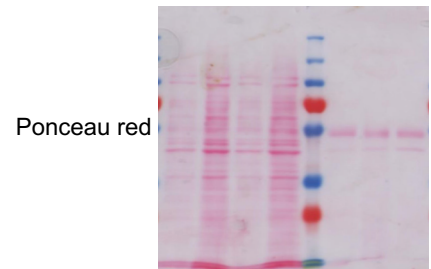

**Supplementary Figure S3: FANCA partnership in ribosome biogenesis.**

**A.** Western blot illustrating that FANCG and NCL proteins coimmunoprecipitate with FANCA in FANCC-deficient and FANCC-proficient human lymphoblasts issued from an FA patient.

**B.** Example FACS analysis measuring the level of OP-puro incorporation into cells following 30 min of incubation. The black line on the left represents the profile of unstained FANCC proficient (HSC93) cells.

**C.** Western blot illustrating that FANCA coimmunoprecipitates NCL, NPM1 and RPL18 in HSC93 FANCC pathway-proficient lymphoblasts. Two different IPs (IP1 and IP2) realized at one week intervals are reported.

**Supplementary Table 1: list of the cell lines used.**

| Cell line                 | Cell type                                   | FANC pathway status                                           | Origin                                                            | Research Resource Identifier (RRID) |
|---------------------------|---------------------------------------------|---------------------------------------------------------------|-------------------------------------------------------------------|-------------------------------------|
| HeLa                      | Human papillomavirus-adenocarcinoma         | WT                                                            | In house and ATCC                                                 | CVCL_0030                           |
| U2OS                      | Osteosarcoma                                | WT                                                            | In house and ATCC                                                 | CVCL_0042                           |
| HEK293                    | Human embryonic kidney                      | WT                                                            | In house                                                          | CVCL_0045                           |
| HSC93                     | EBV-immortalized lymphoblasts               | WT                                                            | Gift of M. Buchwald lab, received in the 90s                      | CVCL_G049                           |
| HSC72                     | EBV-immortalized lymphoblasts               | <i>FANCA</i> <sup>-/-</sup> Homozygous Ex18-28del             | Gift of M. Buchwald lab, received in the 90s & Coriell Repository | CVCL_AK37                           |
| HSC99                     | EBV-immortalized lymphoblasts               | Not determined                                                | Gift of M. Buchwald lab, received in the 90s                      | CVCL_G050)                          |
| HSC536                    | EBV-immortalized lymphoblasts               | <i>FANCC</i> <sup>-/-</sup> p.Leu554Pro (c.1661T>C); ?        | Gift of M. Buchwald lab, received in the 90s & Coriell Repository | CVCL_G045                           |
| HSC72CORR                 | EBV-immortalized lymphoblasts               | <i>FANCA</i> <sup>-/-</sup> + <i>FANCA</i>                    | Gift of M. Buchwald lab, received in the 90s                      | #                                   |
| HSC536CORR                | EBV-immortalized lymphoblasts               | <i>FANCC</i> <sup>-/-</sup> + <i>FANCC</i>                    | Gift of M. Buchwald lab, received in the 90s                      | #                                   |
| EGF004                    | EBV-immortalized lymphoblasts               | <i>FANCG</i> <sup>-/-</sup>                                   | Gift of J Soulier lab                                             | #                                   |
| EGF070                    | EBV-immortalized lymphoblasts               | <i>FANCG</i> <sup>-/-</sup>                                   | Gift of J Soulier lab                                             | #                                   |
| MRC5                      | Human primary fibroblasts                   | WT                                                            | In house                                                          | CVCL_0440                           |
| MRC5-SV                   | SV40-immortalized fibroblasts               | WT                                                            | In house                                                          | #                                   |
| GM03657                   | EBV-immortalized lymphoblasts               | WT                                                            | Coriell Repository                                                | CVCL_7398                           |
| GM03348                   | Human primary fibroblasts                   | WT                                                            | Coriell Repository                                                | CVCL_7382                           |
| GM03652                   | Human primary fibroblasts                   | WT                                                            | Coriell Repository                                                | CVCL_7397                           |
| GM05757                   | Human primary fibroblasts                   | WT                                                            | Coriell Repository                                                | CVCL_7437                           |
| GM16754                   | Human primary fibroblasts                   | <i>FANCC</i> <sup>-/-</sup>                                   | Coriell Repository                                                | CVCL_AK43                           |
| GM00449                   | Human primary fibroblasts                   | <i>FANCC</i> <sup>-/-</sup> Homozygous c.456+4A>T (IVS4+4A>T) | Coriell Repository                                                | CVCL_F125                           |
| GM02361                   | Human primary fibroblasts                   | <i>FANCG</i> <sup>-/-</sup>                                   | Coriell Repository                                                | CVCL_AK22                           |
| GM13136                   | Human GM00449-SV40-immortalized fibroblasts | <i>FANCC</i> <sup>-/-</sup> Homozygous c.456+4A>T (IVS4+4A>T) | Coriell Repository                                                | CVCL_F126                           |
| GM16635                   | Human GM00449-SV40-immortalized fibroblasts | <i>FANCG</i> <sup>-/-</sup>                                   | Coriell Repository                                                | CVCL_F634                           |
| AS911                     | Human primary fibroblasts                   | WT                                                            | Gift of A. Sarasin lab                                            | #                                   |
| PD352                     | Human primary fibroblasts                   | <i>FANCG</i> <sup>-/-</sup>                                   | In house                                                          | #                                   |
| EGF47                     | Human primary fibroblasts                   | <i>FANCA</i> <sup>-/-</sup> 1263-1264del; ?                   | Gift of J Soulier lab                                             | #                                   |
| EGF47CORR                 | Human primary fibroblasts                   | <i>FANCA</i> <sup>-/-</sup> + <i>FANCA</i>                    | Gift of J Soulier lab                                             | #                                   |
| EGF56                     | Human primary fibroblasts                   | <i>FANCA</i> <sup>-/-</sup> L1305D; V372fs                    | Gift of J Soulier lab                                             | #                                   |
| EGF56CORR                 | Human primary fibroblasts                   | <i>FANCA</i> <sup>-/-</sup> + <i>FANCA</i>                    | Gift of J Soulier lab                                             | #                                   |
| EGF71                     | Human primary fibroblasts                   | <i>FANCA</i> <sup>-/-</sup> S725fs; F1306fs                   | Gift of J Soulier lab                                             | #                                   |
| EGF71CORR                 | Human primary fibroblasts                   | <i>FANCA</i> <sup>-/-</sup> + <i>FANCA</i>                    | Gift of J Soulier lab                                             | #                                   |
| EGF72                     | Human primary fibroblasts                   | <i>FANCA</i> <sup>-/-</sup> S1187fs; ?                        | Gift of J Soulier lab                                             | #                                   |
| EGF72CORR                 | Human primary fibroblasts                   | <i>FANCA</i> <sup>-/-</sup> + <i>FANCA</i>                    | Gift of J Soulier lab                                             | #                                   |
| Mouse Primary Fibroblasts |                                             |                                                               | In house                                                          | #                                   |



**Supplementary Table 2: list of used siRNA.**

| <b>GENE</b>   | <b>SEQUENCE</b>                                                         | <b>SEQUENCE CODE</b>             |
|---------------|-------------------------------------------------------------------------|----------------------------------|
| <i>LACZ</i>   | CGUCGACGGAAUACUUCGA                                                     | #                                |
| <i>FANCA</i>  | GUACAGCAGCAAUUUCUUA<br>GAUCGUGGCUCUUCAGGAA<br>GGACAUCACUGCCCACUUC       | FANCA1<br>FANCA2<br>FANCA3       |
| <i>FANCD2</i> | GGAGAUUGAUGGUCUACUA<br>AACAGCCAUGGAUACACUUGATT<br>CAGAGUUUGCUUCACUCUCUA | FANCD2_1<br>FANCD2_2<br>FANCD2_3 |
| <i>FANCC</i>  | GAGAGAAUCAUCUUAUUGG<br>GGAAUCGUCUUGGCAUUGA<br>GGUAUGCACCUAUAGAUUA       | FANCC_1<br>FANCC_2<br>FANCC_3    |
| <i>FANCG</i>  | UGCUUCACCAUCAUUAGGAAU<br>CCUGUGAAAUUUGCCCUAGUU                          | FANCG_1<br>FANCG_2               |
| <i>ATM</i>    | ATM1-492 (Invitrogen)                                                   | #                                |
| <i>ATR</i>    | HSS100876, HSS10877, HSS878 (Invitrogen)                                | #                                |

**Supplementary Table 3: list of antibodies used:**

| Antibody target                  | Supplier          | Code N°    | Specie | WB dilution | IF dilution | CHIP | IP |
|----------------------------------|-------------------|------------|--------|-------------|-------------|------|----|
| Alexa-Fluor Secondary Antibodies | Life Technologies |            | D      |             | 1:1000      |      |    |
| FANCA                            | Bethyl            | A301-980A  | R      | 1:1000      |             |      | X  |
| FANCA                            | FARF              | FANCA-1    | R      | 1:1000      |             |      |    |
| FANCA                            | Abcam             | ab97578    | R      | 1:1000      |             |      | X  |
| FANCA                            | R&D               | AF6026     | G      | 1 :500      |             |      |    |
| FANCA                            | Cell Signalling   | #14657     | R      | 1 :1000     |             |      | X  |
| FANCC                            | FARF              | FANCC-2    | R      | 1:1000      |             |      |    |
| FANCG                            | Santa Cruz        | sc-393382  | M      | 1 :500      |             |      | X  |
| FANCD2                           | Novus             | NB100-182  | R      |             |             | 4µg  |    |
| FANCD2                           | Abcam             | Ab2187     | R      | 1:1000      |             |      |    |
| FANCD2 (F117)                    | Santa Cruz        | sc-20022   | M      | 1:1000      |             |      |    |
| Fibrillarin                      | Abcam             | ab5821     | R      | 1:1000      | 1:2000      |      |    |
| G4s- (clone1H6)                  | Merck             | MABE       | M      |             | 1:200       |      |    |
| H2AX                             | Abcam             | ab11175    | R      | 1:1000      |             |      |    |
| γH2AX (JBW301)                   | Millipore         | 05-636     | M      | 1:1000      | 1:2000      |      |    |
| H3K9me3 (6F12-H4)                | Millipore         | 05-12432   | M      |             |             | 4µg  |    |
| H3K4me3                          | Active motif      | #61379     | M      |             |             | 4µg  |    |
| Lamin A/C                        | Santa Cruz        | sc-7292    | M      | 1:1000      |             |      |    |
| NPM1 (FC61991)                   | Thermo Fisher     | 32-5200    | M      | 1:1000      | 1:500       |      | X  |
| Nucleolin (4E2)                  | Abcam             | ab13541    | M      |             | 1:4000      |      | X  |
| RNAPolII                         | Abcam             | ab101977   | R      |             |             | 4µg  |    |
| S9.6                             | P. Pasero's team  |            | M      |             | 1:200       |      |    |
| UBF (F9)                         | Santa Cruz        | sc-13125   | M      | 1:1000      | 1:250       |      |    |
| Vinculin (spm227)                | Abcam             | ab18058    | M      | 1:4000      |             |      |    |
| EIF4E2                           | Abcam             | ab238519   | R      | 1:1000      |             |      |    |
| EIF6                             | Abcam             | ab245532   | R      | 1:1000      |             |      |    |
| RPL18                            | Novus             | NBP2-13251 | R      | 1 :500      |             |      |    |
| RPL5                             | Bethyl            | A303-933AM | R      | 1:1000      |             |      |    |
| IgG1                             | Dako              | X0931      | M      |             |             | 4µg  | X  |
| IGg                              | Dako              | X0903      | R      |             |             |      | X  |
| IgG                              | Cell Signalling   | #3900      | R      |             |             |      | X  |

FARF: Fanconi Anemia Research Found; R: Rat; M: Mouse; D: Donkey; G: Goat

**Supplementary Table 4: Northern blot probe used.**

| Name    | Sequence                           | Position in gene<br>Genbank accession<br>#U13369 |
|---------|------------------------------------|--------------------------------------------------|
| 5'ETS1b | 5'-AGACGAGAACGCCTGACACGCACGGCAC-3' | 297 to 324                                       |

**Supplementary Table 5: list of the ChIP-qPCR primers used.**

| Name  | Forward                | Reverse                | Efficiency<br>( $10^{(-1/\text{slope})-1}$ ) | Elongation<br>T° | Position    |
|-------|------------------------|------------------------|----------------------------------------------|------------------|-------------|
| H1    | GGCGGTTTGAGTGAGACGAGA  | ACGTGCGCTCA2CCGAGAGCAG | 0,95                                         | 58°              | 952-1030    |
| H8    | AGTCGGGTTGCTTGGGAATGC  | CCCTTACGGTACTTGTTGACT  | 0,90                                         | 58°              | 8204-8300   |
| H27   | CCTTCCACGAGAGTGAGAAGCG | CTCGACCTCCCGAAATCGTACA | 1,11                                         | 58°              | 27366-27477 |
| H42.9 | CCCGGGGAGGTATATCTTT    | CCAACCTCTCCGACGACA     | 1,05                                         | 58°              | 42943 to 33 |

Primers pairs were as in (64).

## REFERENCES AND NOTES

1. M. Tsekrekou, K. Stratigi, G. Chatzinikolaou, The nucleolus: In genome maintenance and repair. *Int. J. Mol. Sci.* **18**, 1411 (2017).
2. S. Boulon, B. J. Westman, S. Hutten, F.-M. Boisvert, A. I. Lamond, The nucleolus under stress. *Mol. Cell* **40**, 216–227 (2010).
3. J. M. Liu, S. R. Ellis, Ribosomes and marrow failure: Coincidental association or molecular paradigm? *Blood* **107**, 4583–4588 (2006).
4. D. Ruggero, A. Shimamura, Marrow failure: A window into ribosome biology. *Blood* **124**, 2784–2792 (2014).
5. M. Bogliolo, J. Surrallés, Fanconi anemia: A model disease for studies on human genetics and advanced therapeutics. *Curr. Opin. Genet. Dev.* **33**, 32–40 (2015).
6. R. Ceccaldi, P. Sarangi, A. D. D'Andrea, The Fanconi anaemia pathway: New players and new functions. *Nat. Rev. Mol. Cell Biol.* **17**, 337–349 (2016).
7. A. Gueiderikh, F. Rosselli, J. B. C. Neto, A never-ending story: The steadily growing family of the FA and FA-like genes. *Genet. Mol. Biol.* **40**, 398–407 (2017).
8. R. Ceccaldi, K. Parmar, E. Mouly, M. Delord, J. M. Kim, M. Regairaz, M. Pla, N. Vasquez, Q. S. Zhang, C. Pondarre, R. Peffault de Latour, E. Gluckman, M. Cavazzana-Calvo, T. Leblanc, J. Larghero, M. Grompe, G. Socie, A. D. D'Andrea, J. Soulier, Bone marrow failure in Fanconi anemia is triggered by an exacerbated p53/p21 DNA damage response that impairs hematopoietic stem and progenitor cells. *Cell Stem Cell* **11**, 36–49 (2012).
9. D. Walter, A. Lier, A. Geiselhart, F. B. Thalheimer, S. Huntscha, M. C. Sobotta, B. Moehrle, D. Brocks, I. Bayindir, P. Kaschutnig, K. Muedder, C. Klein, A. Jauch, T. Schroeder, H. Geiger, T. P. Dick, T. Holland-Letz, P. Schmezer, S. W. Lane, M. A. Rieger, M. A. G. Essers, D. A. Williams, A. Trumpp, M. D. Milsom, Exit from dormancy provokes DNA-damage-induced attrition in haematopoietic stem cells. *Nature* **520**, 549–552 (2015).
10. I. V. Rosado, F. Langevin, G. P. Crossan, M. Takata, K. J. Patel, Formaldehyde catabolism is essential in cells deficient for the Fanconi anemia DNA-repair pathway. *Nat. Struct. Mol. Biol.* **18**, 1432–1434 (2011).
11. F. Langevin, G. P. Crossan, I. V. Rosado, M. J. Arends, K. J. Patel, Fancd2 counteracts the toxic effects of naturally produced aldehydes in mice. *Nature* **475**, 53–58 (2011).
12. S. van Twest, V. J. Murphy, C. Hodson, W. Tan, P. Swuec, J. J. O'Rourke, J. Heierhorst, W. Crismani, A. J. Deans, Mechanism of ubiquitination and deubiquitination in the Fanconi anemia pathway. *Mol. Cell* **65**, 247–259 (2017).



13. D. Adachi, T. Oda, H. Yagasaki, K. Nakasato, T. Taniguchi, A. D. D'Andrea, S. Asano, T. Yamashita, Heterogeneous activation of the Fanconi anemia pathway by patient-derived FANCA mutants. *Hum. Mol. Genet.* **11**, 3125–3134 (2002).
14. M. Nepal, C. Ma, G. Xie, W. Jia, P. Fei, Fanconi anemia complementation group C protein in metabolic disorders. *Aging* **10**, 1506–1522 (2018).
15. A. Benitez, W. Liu, A. Palovcak, G. Wang, J. Moon, K. An, A. Kim, K. Zheng, Y. Zhang, F. Bai, A. V. Mazin, X. H. Pei, F. Yuan, Y. Zhang, FANCA promotes DNA double-strand break repair by catalyzing single-strand annealing and strand exchange. *Mol. Cell* **71**, 621–628.e4 (2018).
16. T. Kaddar, M. Carreau, Fanconi anemia proteins and their interacting partners: A molecular puzzle. *Anemia* **2012**, 425814 (2012).
17. D. Briot, G. Mace-Aime, F. Subra, F. Rosselli, Aberrant activation of stress-response pathways leads to TNF-alpha oversecretion in Fanconi anemia. *Blood* **111**, 1913–1923 (2008).
18. F. Rosselli, J. Sanceau, E. Gluckman, J. Wietzerbin, E. Moustacchi, Abnormal lymphokine production: A novel feature of the genetic disease Fanconi anemia. II. In vitro and in vivo spontaneous overproduction of tumor necrosis factor alpha. *Blood* **83**, 1216–1225 (1994).
19. A. Opezzo, J. Bourseguin, E. Renaud, P. Pawlikowska, F. Rosselli, Microphthalmia transcription factor expression contributes to bone marrow failure in Fanconi anemia. *J. Clin. Invest.* **130**, 1377–1391 (2020).
20. H. Zhang, D. E. Kozono, K. W. O'Connor, S. Vidal-Cardenas, A. Rousseau, A. Hamilton, L. Moreau, E. F. Gaudiano, J. Greenberger, G. Bagby, J. Soulier, M. Grompe, K. Parmar, A. D. D'Andrea, TGF-beta inhibition rescues hematopoietic stem cell defects and bone marrow failure in Fanconi anemia. *Cell Stem Cell* **18**, 668–681 (2016).
21. A. Epanchintsev, P. Shyamsunder, R. S. Verma, A. Lyakhovich, IL-6, IL-8, MMP-2, MMP-9 are overexpressed in Fanconi anemia cells through a NF-kappaB/TNF-alpha dependent mechanism. *Mol. Carcinog.* **54**, 1686–1699 (2015).
22. N. Matsushita, Y. Endo, K. Sato, H. Kurumizaka, T. Yamashita, M. Takata, S. Yanagi, Direct inhibition of TNF-alpha promoter activity by Fanconi anemia protein FANCD2. *PLOS ONE* **6**, e23324 (2011).
23. R. Zanier, D. Briot, J. A. Dugas du Villard, A. Sarasin, F. Rosselli, Fanconi anemia C gene product regulates expression of genes involved in differentiation and inflammation. *Oncogene* **23**, 5004–5013 (2004).

24. M. Moriel-Carretero, S. Ovejero, M. Gerus-Durand, D. Vryzas, A. Constantinou, Fanconi anemia FANCD2 and FANCI proteins regulate the nuclear dynamics of splicing factors. *J. Cell Biol.* **216**, 4007–4026 (2017).
25. W. Du, Z. Adam, R. Rani, X. Zhang, Q. Pang, Oxidative stress in Fanconi anemia hematopoiesis and disease progression. *Antioxid. Redox Signal.* **10**, 1909–1921 (2008).
26. G. Pagano, A. A. Talamanca, G. Castello, M. d'Ischia, F. V. Pallardo, S. Petrovic, B. Porto, L. Tiano, A. Zatterale, From clinical description, to in vitro and animal studies, and backward to patients: Oxidative stress and mitochondrial dysfunction in Fanconi anemia. *Free Radic. Biol. Med.* **58**, 118–125 (2013).
27. G. Pagano, P. Degan, M. d'Ischia, F. J. Kelly, B. Nobili, F. V. Pallardo, H. Youssoufian, A. Zatterale, Oxidative stress as a multiple effector in Fanconi anaemia clinical phenotype. *Eur. J. Haematol.* **75**, 93–100 (2005).
28. R. A. Schwab, J. Nieminuszczy, F. Shah, J. Langton, D. Lopez Martinez, C. C. Liang, M. A. Cohn, R. J. Gibbons, A. J. Deans, W. Niedzwiedz, The Fanconi anemia pathway maintains genome stability by coordinating replication and transcription. *Mol. Cell* **60**, 351–361 (2015).
29. M. Kruhlak, E. E. Crouch, M. Orlov, C. Montano, S. A. Gorski, A. Nussenzweig, T. Misteli, R. D. Phair, R. Casellas, The ATM repair pathway inhibits RNA polymerase I transcription in response to chromosome breaks. *Nature* **447**, 730–734 (2007).
30. M. van Sluis, B. McStay, A localized nucleolar DNA damage response facilitates recruitment of the homology-directed repair machinery independent of cell cycle stage. *Genes Dev.* **29**, 1151–1163 (2015).
31. G. R. Kidiyoor, A. Kumar, M. Foiani, ATR-mediated regulation of nuclear and cellular plasticity. *DNA Repair* **44**, 143–150 (2016).
32. D. O. Warmerdam, J. van den Berg, R. H. Medema, Breaks in the 45S rDNA lead to recombination-mediated loss of repeats. *Cell Rep.* **14**, 2519–2527 (2016).
33. H. Ma, T. Pederson, The nucleolus stress response is coupled to an ATR-Chk1-mediated G2 arrest. *Mol. Biol. Cell* **24**, 1334–1342 (2013).
34. R. D. Kennedy, C. C. Chen, P. Stuckert, E. M. Archila, M. A. De la Vega, L. A. Moreau, A. Shimamura, A. D. D'Andrea, Fanconi anemia pathway-deficient tumor cells are hypersensitive to inhibition of ataxia telangiectasia mutated. *J. Clin. Invest.* **117**, 1440–1449 (2007).
35. J. H. Guervilly, G. Mace-Aime, F. Rosselli, Loss of CHK1 function impedes DNA damage-induced FANCD2 monoubiquitination but normalizes the abnormal G2 arrest in Fanconi anemia. *Hum. Mol. Genet.* **17**, 679–689 (2008).

36. M. L. Garcia-Rubio, C. Perez-Calero, S. I. Barroso, E. Tumini, E. Herrera-Moyano, I. V. Rosado, A. Aguilera, The Fanconi anemia pathway protects genome integrity from R-loops. *PLOS Genet.* **11**, e1005674 (2015).
37. C. Y. Jao, A. Salic, Exploring RNA transcription and turnover in vivo by using click chemistry. *Proc. Natl. Acad. Sci. U.S.A.* **105**, 15779–15784 (2008).
38. A. Cammas, S. Millevoi, RNA G-quadruplexes: Emerging mechanisms in disease. *Nucleic Acids Res.* **45**, 1584–1595 (2017).
39. D. Rhodes, H. J. Lipps, G-quadruplexes and their regulatory roles in biology. *Nucleic Acids Res.* **43**, 8627–8637 (2015).
40. P. Richard, J. L. Manley, R Loops and links to human disease. *J. Mol. Biol.* **429**, 3168–3180 (2016).
41. J. M. Santos-Pereira, A. Aguilera, R loops: New modulators of genome dynamics and function. *Nat. Rev. Genet.* **16**, 583–597 (2015).
42. A. C. Hall, L. A. Ostrowski, V. Pietrobon, K. Mekhail, Repetitive DNA loci and their modulation by the non-canonical nucleic acid structures R-loops and G-quadruplexes. *Nucleus* **8**, 162–181 (2017).
43. F. Yuan, L. Qian, X. Zhao, J. Y. Liu, L. Song, G. D'Urso, C. Jain, Y. Zhang, Fanconi anemia complementation group A (FANCA) protein has intrinsic affinity for nucleic acids with preference for single-stranded forms. *J. Biol. Chem.* **287**, 4800–4807 (2012).
44. H. Chasse, S. Boulben, V. Costache, P. Cormier, J. Morales, Analysis of translation using polysome profiling. *Nucleic Acids Res.* **45**, e15 (2017).
45. B. Falini, N. Bolli, A. Liso, M. P. Martelli, R. Mannucci, S. Pileri, I. Nicoletti, Altered nucleophosmin transport in acute myeloid leukaemia with mutated NPM1: Molecular basis and clinical implications. *Leukemia* **23**, 1731–1743 (2009).
46. B. Falini, N. Bolli, J. Shan, M. P. Martelli, A. Liso, A. Pucciarini, B. Bigerna, L. Pasqualucci, R. Mannucci, R. Rosati, P. Gorello, D. Diverio, G. Roti, E. Tiacci, G. Cazzaniga, A. Biondi, S. Schnittger, T. Haferlach, W. Hiddemann, M. F. Martelli, W. Gu, C. Mecucci, I. Nicoletti, Both carboxy-terminus NES motif and mutated tryptophan(s) are crucial for aberrant nuclear export of nucleophosmin leukemic mutants in NPMc+ AML. *Blood* **107**, 4514–4523 (2006).
47. N. Bolli, I. Nicoletti, M. F. De Marco, B. Bigerna, A. Pucciarini, R. Mannucci, M. P. Martelli, A. Liso, C. Mecucci, F. Fabbiano, M. F. Martelli, B. R. Henderson, B. Falini, Born to be exported: COOH-terminal nuclear export signals of different strength ensure

cytoplasmic accumulation of nucleophosmin leukemic mutants. *Cancer Res.* **67**, 6230–6237 (2007).

48. W. Du, J. Li, J. Sipple, J. Chen, Q. Pang, Cytoplasmic FANCA-FANCC complex interacts and stabilizes the cytoplasm-dislocalized leukemic nucleophosmin protein (NPMc). *J. Biol. Chem.* **285**, 37436–37444 (2010).
49. B. Falini, C. Mecucci, E. Tiacci, M. Alcalay, R. Rosati, L. Pasqualucci, R. La Starza, D. Diverio, E. Colombo, A. Santucci, B. Bigerna, R. Pacini, A. Pucciarini, A. Liso, M. Vignetti, P. Fazi, N. Meani, V. Pettrossi, G. Saglio, F. Mandelli, F. Lo-Coco, P. G. Pelicci, M. F. Martelli; GIMEMA Acute Leukemia Working Party, Cytoplasmic nucleophosmin in acute myelogenous leukemia with a normal karyotype. *N. Engl. J. Med.* **352**, 254–266 (2005).
50. N. Meani, M. Alcalay, Role of nucleophosmin in acute myeloid leukemia. *Expert Rev. Anticancer Ther.* **9**, 1283–1294 (2009).
51. G. D. Bailey, H. M. H. Qutob, A. Akhtar, N. H. Russell, C. H. Seedhouse, DNA damage corrects the aberrant cytoplasmic localisation of nucleophosmin in NPM1 mutated acute myeloid leukaemia. *Br. J. Haematol.* **186**, 343–347 (2019).
52. N. B. Collins, J. B. Wilson, T. Bush, A. Thomashevski, K. J. Roberts, N. J. Jones, G. M. Kupfer, ATR-dependent phosphorylation of FANCA on serine 1449 after DNA damage is important for FA pathway function. *Blood* **113**, 2181–2190 (2009).
53. T. Taniguchi, I. Garcia-Higuera, B. Xu, P. R. Andreassen, R. C. Gregory, S. T. Kim, W. S. Lane, M. B. Kastan, A. D. D'Andrea, Convergence of the fanconi anemia and ataxia telangiectasia signaling pathways. *Cell* **109**, 459–472 (2002).
54. D. D. Scott, M. Oeffinger, Nucleolin and nucleophosmin: Nucleolar proteins with multiple functions in DNA repair. *Biochem. Cell Biol.* **94**, 419–432 (2016).
55. Y. Zhang, A. C. Duc, S. Rao, X. L. Sun, A. N. Bilbee, M. Rhodes, Q. Li, D. J. Kappes, J. Rhodes, D. L. Wiest, Control of hematopoietic stem cell emergence by antagonistic functions of ribosomal protein paralogs. *Dev. Cell* **24**, 411–425 (2013).
56. A. J. Finch, C. Hilcenko, N. Basse, L. F. Drynan, B. Goyenechea, T. F. Menne, A. Gonzalez Fernandez, P. Simpson, C. S. D'Santos, M. J. Arends, J. Donadieu, C. Bellanne-Chantelot, M. Costanzo, C. Boone, A. N. McKenzie, S. M. Freund, A. J. Warren, Uncoupling of GTP hydrolysis from eIF6 release on the ribosome causes Shwachman-Diamond syndrome. *Genes Dev.* **25**, 917–929 (2011).
57. S. Tan, L. Kermasson, A. Hoslin, P. Jaako, A. Faille, A. Acevedo-Arozena, E. Lengline, D. Ranta, M. Poiree, O. Fenneteau, H. Ducou le Pointe, S. Fumagalli, B. Beaupain, P. Nitschke, C. Bole-Feysot, J. P. de Villartay, C. Bellanne-Chantelot, J. Donadieu, C. Kannengiesser, A.



- J. Warren, P. Revy, EFL1 mutations impair eIF6 release to cause Shwachman-Diamond syndrome. *Blood* **134**, 277–290 (2019).
58. O. Haimov, U. Sehrawat, A. Tamarkin-Ben Harush, A. Bahat, A. Uzonyi, A. Will, H. Hiraishi, K. Asano, R. Dikstein, Dynamic interaction of eukaryotic initiation factor 4G1 (eIF4G1) with eIF4E and eIF1 underlies scanning-dependent and -independent translation. *Mol. Cell. Biol.* **38**, e00139-18 (2018).
59. M. Badura, S. Braunstein, J. Zavadil, R. J. Schneider, DNA damage and eIF4G1 in breast cancer cells reprogram translation for survival and DNA repair mRNAs. *Proc. Natl. Acad. Sci. U.S.A.* **109**, 18767–18772 (2012).
60. Z. Liang, F. Liang, Y. Teng, X. Chen, J. Liu, S. Longrich, T. Rao, A. M. Green, N. B. Collins, Y. Xiong, L. Lan, P. Sung, G. M. Kupfer, Binding of FANCI-FANCD2 complex to RNA and R-loops stimulates Robust FANCD2 monoubiquitination. *Cell Rep.* **26**, 564–572.e5 (2019).
61. S. B. Sondalle, S. Longrich, L. M. Ogawa, P. Sung, S. J. Baserga, Fanconi anemia protein FANCI functions in ribosome biogenesis. *Proc. Natl. Acad. Sci. U.S.A.* **116**, 2561–2570 (2019).
62. N. T. Ingolia, G. A. Brar, S. Rouskin, A. M. McGeachy, J. S. Weissman, The ribosome profiling strategy for monitoring translation in vivo by deep sequencing of ribosome-protected mRNA fragments. *Nat. Protoc.* **7**, 1534–1550 (2012).
63. V. Gandin, K. Sikstrom, T. Alain, M. Morita, S. McLaughlan, O. Larsson, I. Topisirovic, Polysome fractionation and analysis of mammalian translomes on a genome-wide scale. *J. Vis. Exp.* **17**, 51455 (2014).
64. C. Grandori, N. Gomez-Roman, Z.A. Felton-Edkins, C. Ngouenet, D. A. Galloway, R. N. Eisenman, R. J. White, c-Myc binds to human ribosomal DNA and stimulates transcription of rRNA genes by RNA polymerase I. *Nat. Cell Biol.* **7**, 311–318 (2005).
